# Supplementary material for: Nano-FTIR Spectroscopy of the Solid Electrolyte Interphase Layer on a Thin-Film Silicon Li-Ion Anode
Source: PubMed Central journal article supplement — ACS Appl Mater Interfaces. 2023 Jan 25;15(5):6755–67. doi: 10.1021/acsami.2c19484 (PMC9923681; doi:10.1021/acsami.2c19484), 2023-01-25
Supplement: am2c19484_si_001.pdf [file am2c19484_si_001.pdf]

# Supporting Information for:

## Nano-FTIR Spectroscopy of the Solid Electrolyte Interphase Layer on a Thin-Film Silicon Li-ion Anode

Andrew Dopilka<sup>1\*</sup>, Yueran Gu<sup>1,2</sup>, Jonathan M. Larson<sup>1</sup>, Vassilia Zorba<sup>1,2</sup>, Robert Kostecki<sup>1\*</sup>

<sup>1</sup>Energy Storage and Distributed Resources Division, Lawrence Berkeley National Laboratory, Berkeley, CA 94720, USA

<sup>2</sup>Department of Mechanical Engineering, University of California, Berkeley, CA 94720, USA

Corresponding Author\*

Andrew Dopilka [adopilka@lbl.gov](mailto:adopilka@lbl.gov)

Robert Kostecki [r\\_kostecki@lbl.gov](mailto:r_kostecki@lbl.gov)

### Figures

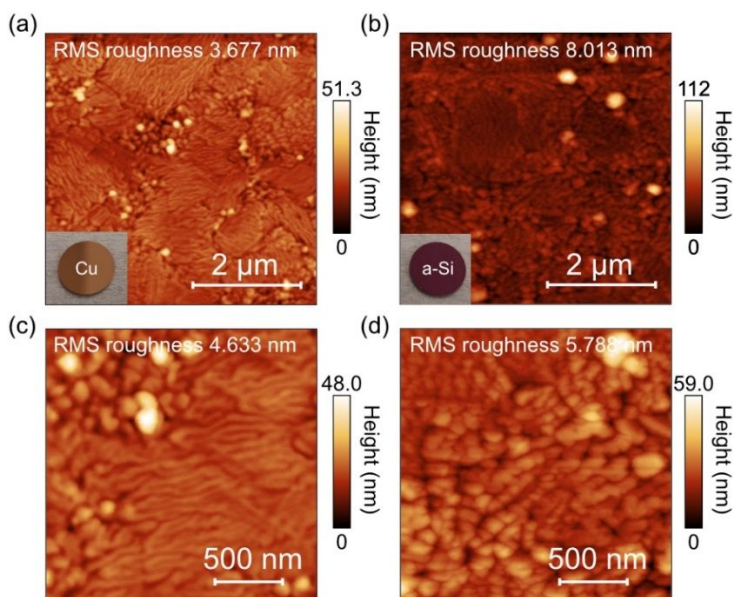

**Figure S1** AFM topography of the as sputtered **(a)(c)** Cu electrode and **(b)(d)** amorphous Si (a-Si) electrodes. The insets include the RMS roughness and photographs of the  $\frac{1}{2}$  inch diameter electrodes.

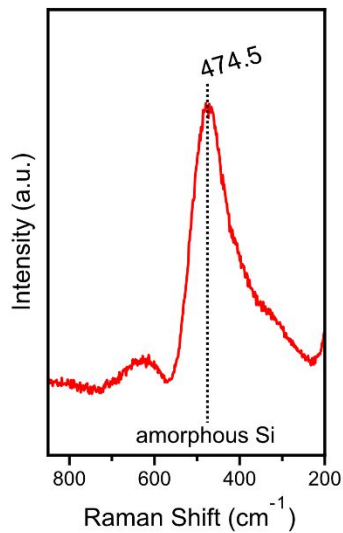

**Figure S2** Raman spectrum of the sputtered a-Si film showing the broad peak characteristic of amorphous Si. The raman spectroscopy was performed with a Renishwa inVia Raman Microscope.

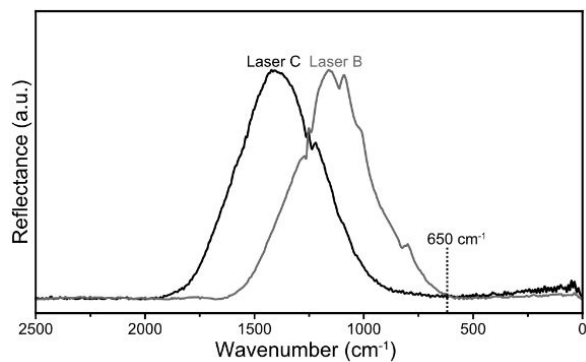

**Figure S3** Near-field reflectance spectra of the IR lasers on a Si wafer used in this work. These wavenumber distributions demonstrate the wavenumber range used to measure the IR absorption of the SEI layer.

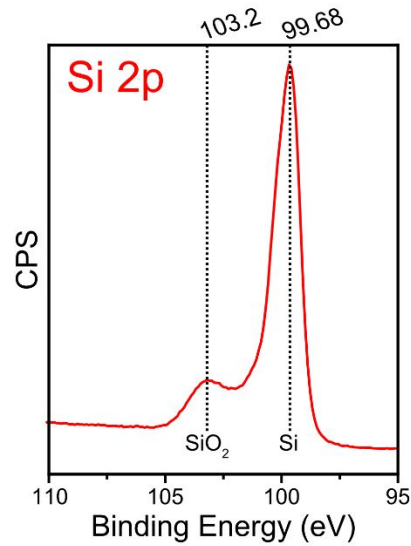

**Figure S4** High resolution XPS spectrum of the Si 2p region of the pristine a-Si electrode.

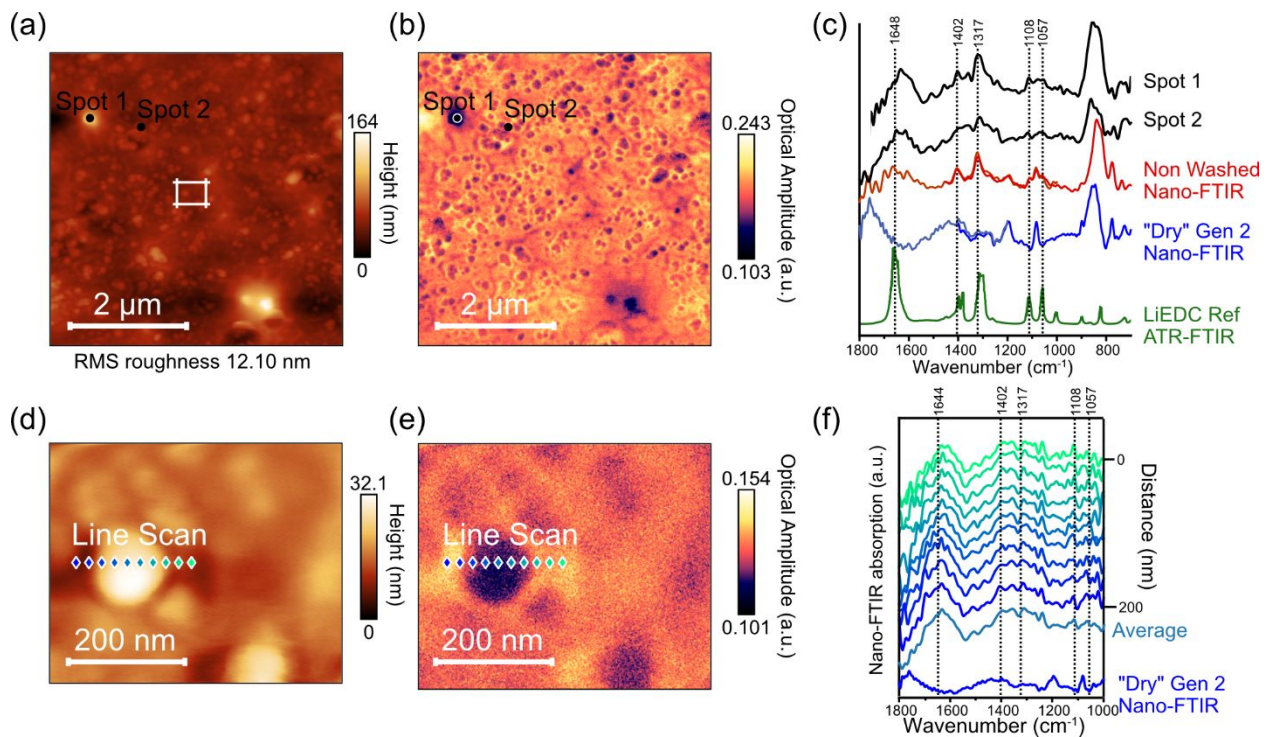

**Figure S5** 5 x 5  $\mu\text{m}$  AFM topography (a), and near-field white light image (b) of the washed (after 5 second immersion in DMC) a-Si electrode after the 5 CV cycles and 12 hour 0.05 V hold. Nano-FTIR spectra at two spots marked in images (a) and (b) compared with the non-washed nano-FTIR spectra, “dry” Gen 2 electrolyte and LiEDC reference spectra (c). 0.5 x 0.4  $\mu\text{m}$  AFM topography (d) and near-field whitelight image (e) of the washed electrode. Nano-FTIR spectra from the line scan at the locations marked in images (d) and (e) (f).

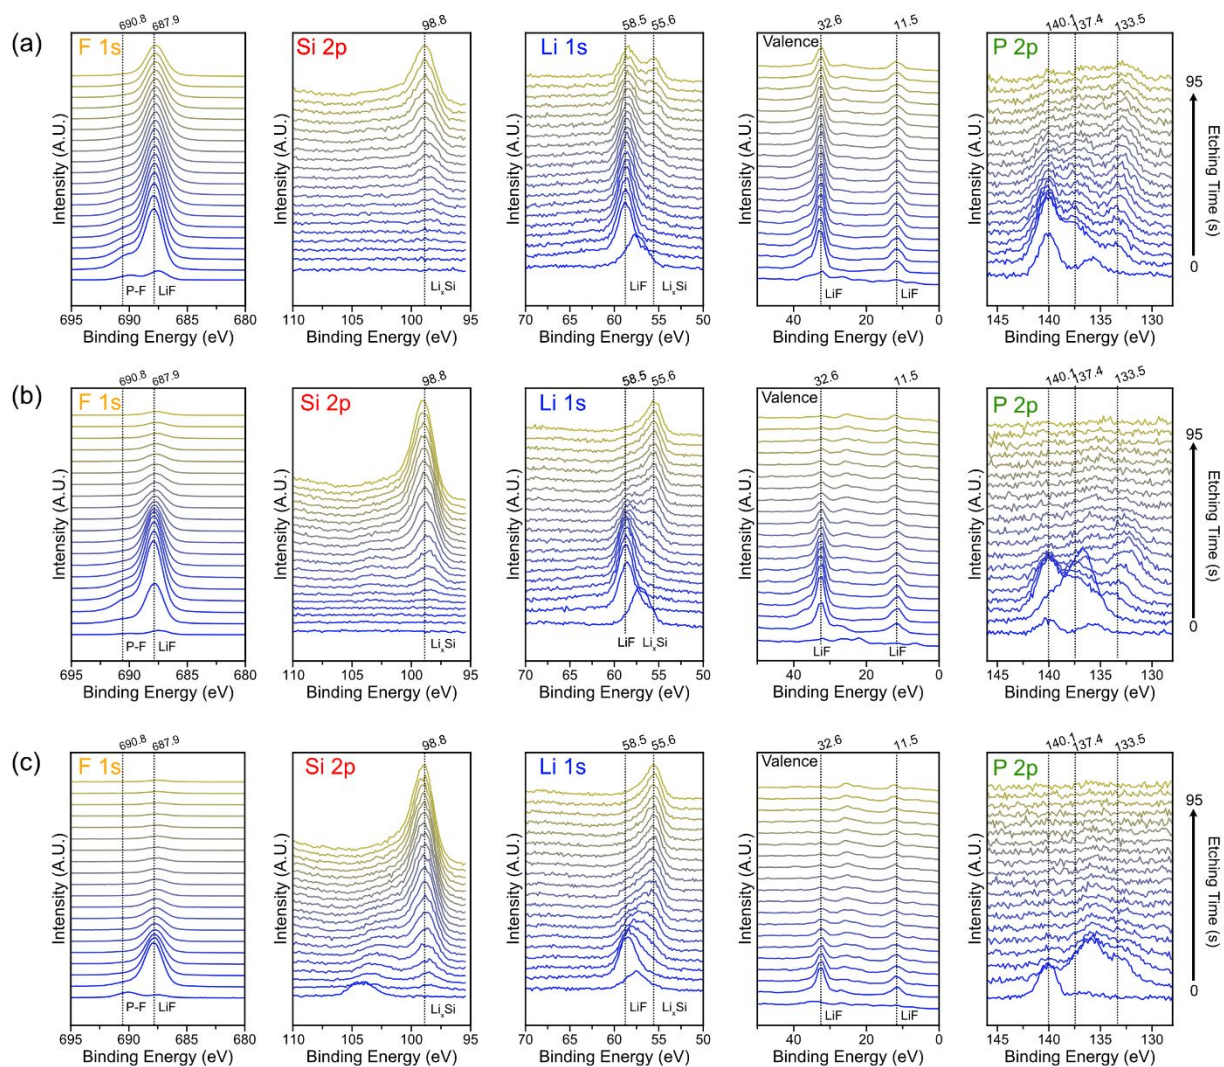

**Figure S6** High resolution XPS spectra of F 1s, Si 2p, Li 1s, valence<sup>1</sup>, and P 2p for the a-Si electrodes after 5 CV cycles and a 12 hour hold at 0.05 V that were (a) non-washed, (b) washed for 1 s with 50  $\mu$ L of DMC, and (c) immersed in 5 mL of DMC for 5 s.

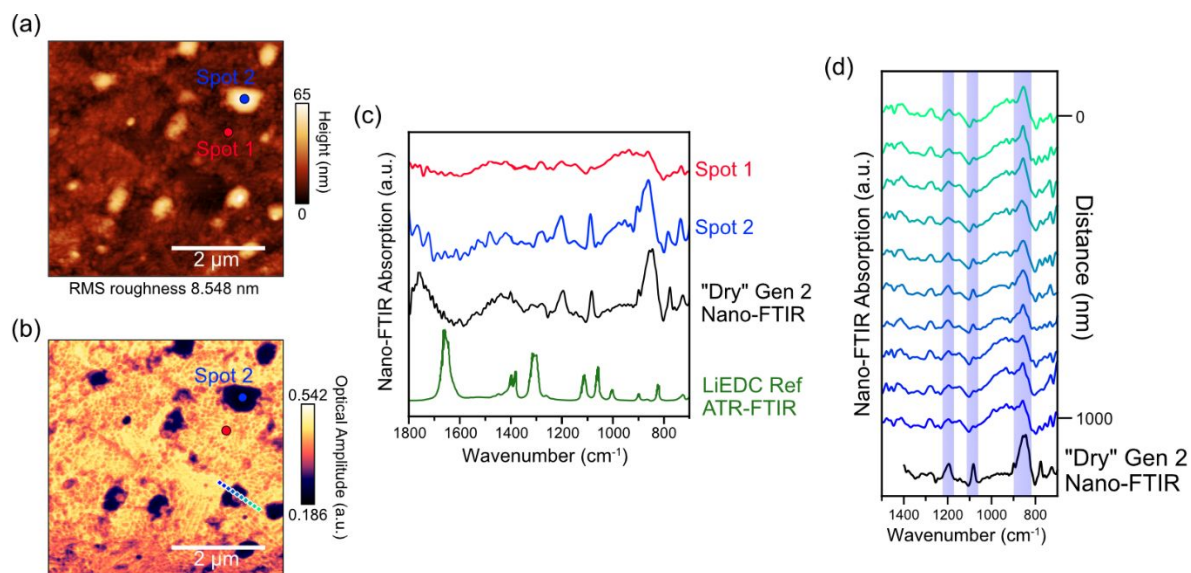

**Figure S7** AFM topography **(a)** and near-field white light image **(b)** of the non-washed a-Si electrode scanned from OCV to 0.5 V at 0.1 mV/s. Nano-FTIR spectra from two locations shown in **(a)** compared with the “Dry” Gen 2 electrolyte and LiEDC reference spectra **(c)**. Nano-FTIR spectra from the line scan at the locations marked in image **(b)** **(d)**.

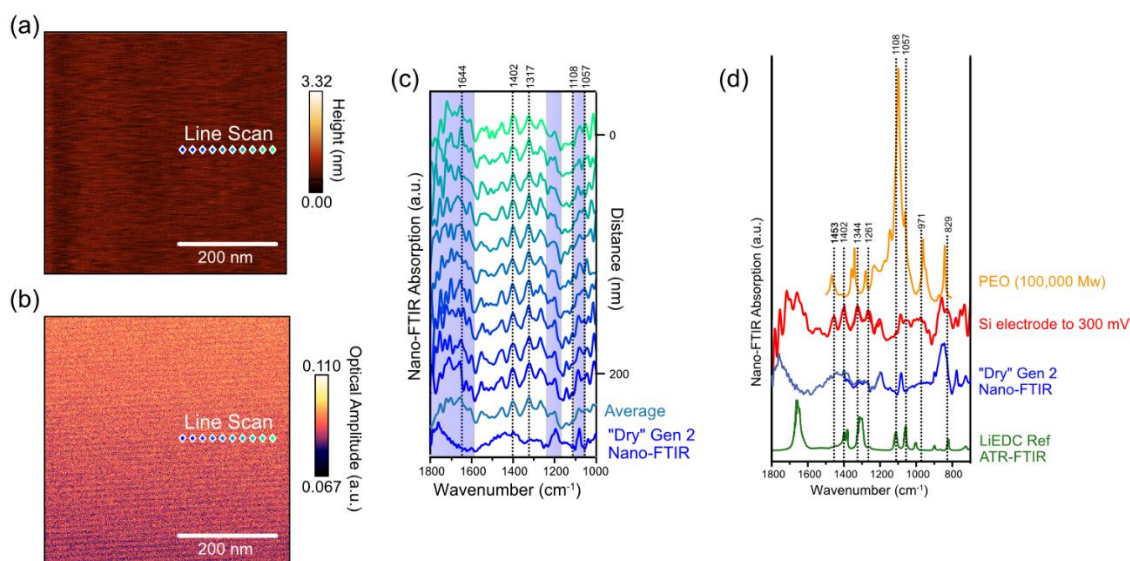

**Figure S8** AFM topography **(a)** and near-field white light image **(b)** of the non-washed a-Si electrode scanned from OCV to 0.3 V at 0.1 mV/s. Nano-FTIR spectra from the line scan at the locations marked in the AFM and white light images **(a)** and **(b)** compared with the spectrum of “Dry” Gen 2 electrolyte **(c)**. Comparison of the nano-FTIR spectra obtained at 0.3 V to the ATR-FTIR spectra of PEO (100,000 molecular weight (Mw) from ref<sup>2</sup>), “Dry” Gen 2 electrolyte and LiEDC.

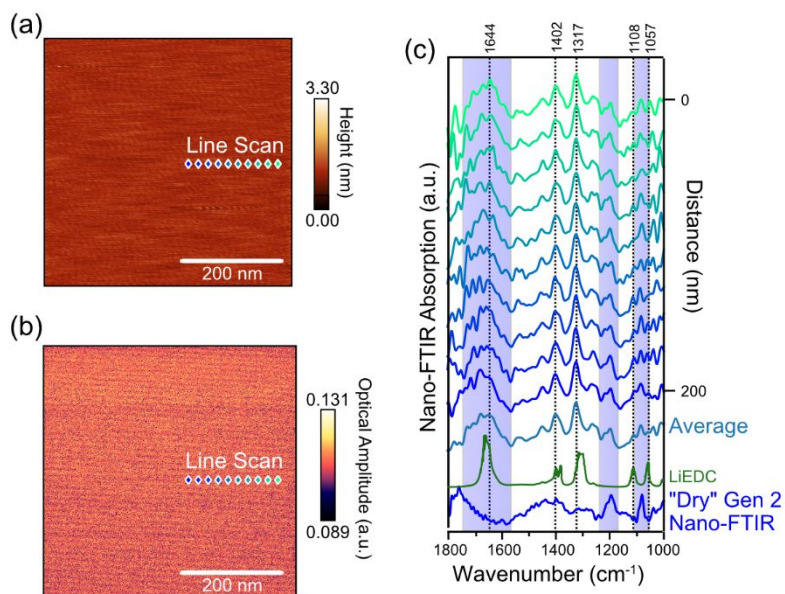

**Figure S9** AFM topography **(a)** and near-field white light image **(b)** of the non-washed a-Si electrode scanned from OCV to 0.05 V at 0.1 mV/s. Nano-FTIR spectra from the line scan at the locations marked in the AFM and white light images compared with the “Dry” Gen 2 electrolyte and LiEDC reference **(c)**.

## Tables

**Table S1.** Review of the washing procedures reported in the literature for studying the SEI on Si anodes

| Si Material                           | Washing time/Method                               | Washing Solvent | Washing Amount        | Ref   |
|---------------------------------------|---------------------------------------------------|-----------------|-----------------------|-------|
| 50 nm a-Si on Cu foil                 | 5 s                                               | DMC             | N/A                   | 3     |
| Si wafer                              | 1-2 minutes                                       | DMC             | 1 mL                  | 4     |
| Si Wafer                              | Rinsed twice                                      | DMC             | N/A                   | 5     |
| 50 nm a-Si on Cu foil                 | Gently Rinsed in Triplicate, removed with kimwipe | DEC             | N/A                   | 6     |
| Si wafer                              | Soaked three times                                | DEC             | N/A                   | 7,8   |
| Si wafer                              | 2 minutes                                         | DMC             | N/A                   | 9     |
| Binder free Si nanoparticle electrode | N/A                                               | DMC             | N/A                   | 10    |
| a-Si thin film on Cu foil (neutron)   | N/A                                               | DMC             | 2 mL                  | 11    |
| Si on Cu grid                         | N/A                                               | DEC             | 50 $\mu$ L            | 12    |
| Si wafer                              | 2 min                                             | DMC             | N/A                   | 13    |
| Si composite electrode                | N/A Sonication electrode                          | DMC             | N/A                   | 14    |
| Si composite electrode                | Three successive baths, 1 minute each             | DMC             | 2 mL bath             | 15,16 |
| Si wafer                              | Washed three times                                | DEC             | $\sim$ 5 mL each time | 17    |
| a-Si thin film on Cu                  | 10 s                                              | DEC             | 200 $\mu$ L           | 18    |
| Si nanowires                          | Rinse three times                                 | DMC             | N/A                   | 19    |

|                                      |                           |                |                 |    |
|--------------------------------------|---------------------------|----------------|-----------------|----|
| Binder free silicon electrode        | Rinsed four times         | DMC            | 1 mL (in total) | 20 |
| Si composite electrode               | Rinsed three times        | DMC            | N/A             | 21 |
| Porous Si composite electrode        | Softly washed three times | DMC            | N/A             | 22 |
| Si thin film                         | Soaked                    | Protonated DMC | N/A             | 23 |
| Si nanowires                         | Overnight                 | DMC            | N/A             | 24 |
| Si nanoparticle electrode            | Carefully rinsed 4 times  | DMC            | 1 mL (in total) | 25 |
| Si Wafer                             | 60 s                      | DMC            | 1 mL            | 26 |
| Si thin film                         | N/A                       | DMC            | N/A             | 27 |
| Si composite electrode               | N/A                       | DMC            | N/A             | 28 |
| Si thin film                         | 60 s                      | DMC            | 1 mL            | 29 |
| Si Wafer                             | N/A                       | DMC            | N/A             | 30 |
| Thin film Si                         | Rinsed four times         | DEC            | N/A             | 31 |
| Si nanoparticles composite electrode | N/A                       | DEC            | N/A             | 32 |
| Si thin film                         | Gently rinsed             | DMC            | N/A             | 33 |
| Si Thin film                         | Gently rinsed             | DMC            | N/A             | 34 |
| Si wafer                             | Washed three times        | DEC/PC         | 1-3 mL          | 35 |
| Si nanoparticle composite electrode  | N/A                       | DMC            | N/A             | 36 |
| Si thin film/Si nanowires            | N/A                       | DMC            | N/A             | 37 |

## References

- (1) Dedryvère, R.; Martinez, H.; Leroy, S.; Lemordant, D.; Bonhomme, F.; Biensan, P.; Gonbeau, D. Surface Film Formation on Electrodes in a LiCoO<sub>2</sub>/Graphite Cell: A Step by Step XPS Study. *J Power Sources* **2007**, *174*, 462–468.
- (2) He, X.; Larson, J. M.; Bechtel, H. A.; Kostecky, R. In Situ Infrared Nanospectroscopy of the Local Processes at the Li/Polymer Electrolyte Interface. *Nat Commun* **2022**, *13*.
- (3) Schnabel, M.; Lin, T. C.; Arca, E.; Yoon, I.; Veith, G. M.; He, X.; Kostecky, R. Stable SEI Formation on Al-Si-Mn Metallic Glass Li-Ion Anode. *J Electrochem Soc* **2021**, *168*, 100521.
- (4) Schnabel, M.; Arca, E.; Ha, Y.; Stetson, C.; Teeter, G.; Han, S. D.; Stradins, P. Enhanced Interfacial Stability of Si Anodes for Li-Ion Batteries via Surface SiO<sub>2</sub> Coating. *ACS Appl Energy Mater* **2020**, *3*, 8842–8849.
- (5) Cao, C.; Abate, I. I.; Sivonxay, E.; Shyam, B.; Jia, C.; Moritz, B.; Devereaux, T. P.; Persson, K. A.; Steinrück, H. G.; Toney, M. F. Solid Electrolyte Interphase on Native Oxide-Terminated Silicon Anodes for Li-Ion Batteries. *Joule* **2019**, *3*, 762–781.
- (6) Nanda, J.; Yang, G.; Hou, T.; Voylov, D. N.; Li, X.; Ruther, R. E.; Naguib, M.; Persson, K.; Veith, G. M.; Sokolov, A. P. Unraveling the Nanoscale Heterogeneity of Solid Electrolyte Interphase Using Tip-Enhanced Raman Spectroscopy. *Joule* **2019**, *3*, 2001–2019.
- (7) Vogl, U. S.; Lux, S. F.; Crumlin, E. J.; Liu, Z.; Terborg, L.; Winter, M.; Kostecky, R. The Mechanism of SEI Formation on a Single Crystal Si(100) Electrode. *J Electrochem Soc* **2015**, *162*, A603–A607.

- (8) Vogl, U. S.; Lux, S. F.; Das, P.; Weber, A.; Placke, T.; Kostecki, R.; Winter, M. The Mechanism of SEI Formation on Single Crystal Si(100), Si(110) and Si(111) Electrodes. *J Electrochem Soc* **2015**, *162*, A2281–A2288.
- (9) Yin, Y.; Arca, E.; Wang, L.; Yang, G.; Schnabel, M.; Cao, L.; Xiao, C.; Zhou, H.; Liu, P.; Nanda, J.; et al. Nonpassivated Silicon Anode Surface. *ACS Appl Mater Interfaces* **2020**, *12*, 26593–26600.
- (10) Nie, M.; Abraham, D. P.; Chen, Y.; Bose, A.; Lucht, B. L. Silicon Solid Electrolyte Interphase (SEI) of Lithium Ion Battery Characterized by Microscopy and Spectroscopy. *Journal of Physical Chemistry C* **2013**, *117*, 13403–13412.
- (11) Fears, T. M.; Doucet, M.; Browning, J. F.; Baldwin, J. K. S.; Winiarz, J. G.; Kaiser, H.; Taub, H.; Sacci, R. L.; Veith, G. M. Evaluating the Solid Electrolyte Interphase Formed on Silicon Electrodes: A Comparison of: Ex Situ X-Ray Photoelectron Spectroscopy and in Situ Neutron Reflectometry. *Physical Chemistry Chemical Physics* **2016**, *18*, 13927–13940.
- (12) Huang, W.; Wang, J.; Braun, M. R.; Zhang, Z.; Li, Y.; Boyle, D. T.; McIntyre, P. C.; Cui, Y. Dynamic Structure and Chemistry of the Silicon Solid-Electrolyte Interphase Visualized by Cryogenic Electron Microscopy. *Matter* **2019**, *1*, 1232–1245.
- (13) Stetson, C.; Yin, Y.; Norman, A.; Harvey, S. P.; Schnabel, M.; Ban, C.; Jiang, C. S.; DeCaluwe, S. C.; Al-Jassim, M. Evolution of Solid Electrolyte Interphase and Active Material in the Silicon Wafer Model System. *J Power Sources* **2021**, *482*.
- (14) Zhang, Y.; Li, X.; Sivonxay, E.; Wen, J.; Persson, K. A.; Vaughey, J. T.; Key, B.; Dogan, F. Silicon Anodes with Improved Calendar Life Enabled By Multivalent Additives. *Adv Energy Mater* **2021**, *11*.
- (15) Philippe, B.; Dedryvère, R.; Allouche, J.; Lindgren, F.; Gorgoi, M.; Rensmo, H.; Gonbeau, D.; Edström, K. Nanosilicon Electrodes for Lithium-Ion Batteries: Interfacial Mechanisms Studied by Hard and Soft X-Ray Photoelectron Spectroscopy. *Chemistry of Materials* **2012**, *24*, 1107–1115.
- (16) Philippe, B.; Dedryvère, R.; Gorgoi, M.; Rensmo, H.; Gonbeau, D.; Edström, K. Role of the LiPF<sub>6</sub> Salt for the Long-Term Stability of Silicon Electrodes in Li-Ion Batteries - A Photoelectron Spectroscopy Study. *Chemistry of Materials* **2013**, *25*, 394–404.
- (17) Schroder, K. W.; Celio, H.; Webb, L. J.; Stevenson, K. J. Examining Solid Electrolyte Interphase Formation on Crystalline Silicon Electrodes: Influence of Electrochemical Preparation and Ambient Exposure Conditions. *Journal of Physical Chemistry C* **2012**, *116*, 19737–19747.
- (18) Hasa, I.; Haregewoin, A. M.; Zhang, L.; Tsai, W. Y.; Guo, J.; Veith, G. M.; Ross, P. N.; Kostecki, R. Electrochemical Reactivity and Passivation of Silicon Thin-Film Electrodes in Organic Carbonate Electrolytes. *ACS Appl Mater Interfaces* **2020**, *12*, 40879–40890.
- (19) He, Y.; Jiang, L.; Chen, T.; Xu, Y.; Jia, H.; Yi, R.; Xue, D.; Song, M.; Genc, A.; Bouchet-Marquis, C.; et al. Progressive Growth of the Solid–Electrolyte Interphase towards the Si Anode Interior Causes Capacity Fading. *Nat Nanotechnol* **2021**, *16*, 1113–1120.



- (20) Young, B. T.; Heskett, D. R.; Nguyen, C. C.; Nie, M.; Woicik, J. C.; Lucht, B. L. Hard X-Ray Photoelectron Spectroscopy (HAXPES) Investigation of the Silicon Solid Electrolyte Interphase (SEI) in Lithium-Ion Batteries. *ACS Appl Mater Interfaces* **2015**, *7*, 20004–20011.
- (21) Chen, X.; Li, X.; Mei, D.; Feng, J.; Hu, M. Y.; Hu, J.; Engelhard, M.; Zheng, J.; Xu, W.; Xiao, J.; et al. Reduction Mechanism of Fluoroethylene Carbonate for Stable Solid-Electrolyte Interphase Film on Silicon Anode. *ChemSusChem* **2014**, *7*, 549–554.
- (22) Li, Q.; Liu, X.; Han, X.; Xiang, Y.; Zhong, G.; Wang, J.; Zheng, B.; Zhou, J.; Yang, Y. Identification of the Solid Electrolyte Interface on the Si/C Composite Anode with FEC as the Additive. *ACS Appl Mater Interfaces* **2019**, *11*, 14066–14075.
- (23) Veith, G. M.; Doucet, M.; Baldwin, J. K.; Sacci, R. L.; Fears, T. M.; Wang, Y.; Browning, J. F. Direct Determination of Solid-Electrolyte Interphase Thickness and Composition as a Function of State of Charge on a Silicon Anode. *Journal of Physical Chemistry C* **2015**, *119*, 20339–20349.
- (24) Chan, C. K.; Ruffo, R.; Hong, S. S.; Cui, Y. Surface Chemistry and Morphology of the Solid Electrolyte Interphase on Silicon Nanowire Lithium-Ion Battery Anodes. *J Power Sources* **2009**, *189*, 1132–1140.
- (25) Nguyen, C. C.; Yoon, T.; Seo, D. M.; Guduru, P.; Lucht, B. L. Systematic Investigation of Binders for Silicon Anodes: Interactions of Binder with Silicon Particles and Electrolytes and Effects of Binders on Solid Electrolyte Interphase Formation. *ACS Appl Mater Interfaces* **2016**, *8*, 12211–12220.
- (26) Ha, Y.; Stetson, C.; Harvey, S. P.; Teeter, G.; Tremolet De Villers, B. J.; Jiang, C. S.; Schnabel, M.; Stradins, P.; Burrell, A.; Han, S. D. Effect of Water Concentration in LiPF<sub>6</sub>-Based Electrolytes on the Formation, Evolution, and Properties of the Solid Electrolyte Interphase on Si Anodes. *ACS Appl Mater Interfaces* **2020**, *12*, 49563–49573.
- (27) Nakai, H.; Kubota, T.; Kita, A.; Kawashima, A. Investigation of the Solid Electrolyte Interphase Formed by Fluoroethylene Carbonate on Si Electrodes. *J Electrochem Soc* **2011**, *158*, A798–A801.
- (28) Hopkins, E. J.; Frisco, S.; Pekarek, R. T.; Stetson, C.; Huey, Z.; Harvey, S.; Li, X.; Key, B.; Fang, C.; Liu, G.; et al. Examining CO<sub>2</sub> as an Additive for Solid Electrolyte Interphase Formation on Silicon Anodes. *J Electrochem Soc* **2021**, *168*, 030534.
- (29) Veith, G. M.; Doucet, M.; Sacci, R. L.; Vacaliuc, B.; Baldwin, J. K.; Browning, J. F. Determination of the Solid Electrolyte Interphase Structure Grown on a Silicon Electrode Using a Fluoroethylene Carbonate Additive. *Sci Rep* **2017**, *7*.
- (30) Stetson, C.; Schnabel, M.; Li, Z.; Harvey, S. P.; Jiang, C. S.; Norman, A.; Decaluwe, S. C.; Al-Jassim, M.; Burrell, A. Microscopic Observation of Solid Electrolyte Interphase Bilayer Inversion on Silicon Oxide. *ACS Energy Lett* **2020**, *5*, 3657–3662.
- (31) Xie, H.; Sayed, S. Y.; Kalisvaart, W. P.; Schaper, S. J.; Müller-Buschbaum, P.; Luber, E. J.; Olsen, B. C.; Haese, M.; Buriak, J. M. Adhesion and Surface Layers on Silicon Anodes Suppress Formation of C-Li<sub>3</sub>.75Si and Solid-Electrolyte Interphase. *ACS Appl Energy Mater* **2020**, *3*, 1609–1616.

- (32) Sina, M.; Alvarado, J.; Shobukawa, H.; Alexander, C.; Manichev, V.; Feldman, L.; Gustafsson, T.; Stevenson, K. J.; Meng, Y. S. Direct Visualization of the Solid Electrolyte Interphase and Its Effects on Silicon Electrochemical Performance. *Adv Mater Interfaces* **2016**, *3*.
- (33) Nadimpalli, S. P. V.; Sethuraman, V. A.; Dalavi, S.; Lucht, B.; Chon, M. J.; Shenoy, V. B.; Guduru, P. R. Quantifying Capacity Loss Due to Solid-Electrolyte-Interphase Layer Formation on Silicon Negative Electrodes in Lithium-Ion Batteries. *J Power Sources* **2012**, *215*, 145–151.
- (34) Li, Z.; Stetson, C.; Teeter, G.; Norman, A.; Ha, Y.; Tremolet De Villers, B. J.; Huey, Z.; Walker, P.; Han, S. D.; Decaluwe, S. C.; et al. Improving Interface Stability of Si Anodes by Mg Coating in Li-Ion Batteries. *ACS Appl Energy Mater* **2020**, *3*, 11534–11539.
- (35) Schroder, K. W.; Dylla, A. G.; Harris, S. J.; Webb, L. J.; Stevenson, K. J. Role of Surface Oxides in the Formation of Solid-Electrolyte Interphases at Silicon Electrodes for Lithium-Ion Batteries. *ACS Appl Mater Interfaces* **2014**, *6*, 21510–21524.
- (36) Zhang, X.; Weng, S.; Yang, G.; Li, Y.; Li, H.; Su, D.; Gu, L.; Wang, Z.; Wang, X.; Chen, L. Interplay between Solid-Electrolyte Interphase and (in)Active Li<sub>x</sub>Si in Silicon Anode. *Cell Rep Phys Sci* **2021**, *2*.
- (37) Pereira-Nabais, C.; Światowska, J.; Chagnes, A.; Ozanam, F.; Gohier, A.; Tran-Van, P.; Cojocar, C. S.; Cassir, M.; Marcus, P. Interphase Chemistry of Si Electrodes Used as Anodes in Li-Ion Batteries. *Appl Surf Sci* **2013**, *266*, 5–16.
